# Supplementary material for: The Predictive Value of Urinary Kidney Injury Molecular 1 for the Diagnosis of Contrast-Induced Acute Kidney Injury after Cardiac Catheterization: A Meta-Analysis
Source: J Interv Cardiol. 2020 Aug 13;2020:4982987. doi: 10.1155/2020/4982987 (PMC7443242; doi:10.1155/2020/4982987)
Supplement: Supplementary Materials — Figure S1: proportion of studies with low, high, or unclear concerns regarding applicability and risks of bias. Table S1: methodological quality assessment with QUADAS-2 tool for the 8 studies included in this meta-analysis. Checklist S1 PRISMA checklist: Preferred Reporting Items for Systematic Reviews and Meta-Analyses. [file 4982987.f1.zip › 4982987.f1/Table S1.xlsx]

## Sheet: 工作表1
	Domain 1					Domain 2				Domain 3				Domain 4
	A				B	A			B	A			B	A					B
	1	2	3	risk	risk	1	2	risk	risk	1	2	risk	risk	1	2	3	4	risk	risk
Akdeniz, D., et al.（2015）	yes	no	yes	high	low	unclear	yes	unclear	low	yes	unclear	unclear	low	yes	yes	yes	yes	low	low
Li, W., et al.（2015）	yes	yes	yes	low	low	yes	yes	low	low	yes	uclear	unclear	low	yes	yes	yes	yes	low	low
Luo, Q., et al.（2013）	yes	no	yes	high	low	yes	unclear	unclear	low	yes	yes	low	low	yes	yes	yes	yes	low	low
Torregrosa, I., et al.（2015）	yes	yes	yes	low	low	yes	yes	low	low	yes	unclear	unclear	low	yes	yes	yes	yes	low	low
Vijayasimha, M., et al.（2014）	yes	yes	yes	low	low	yes	yes	low	low	yes	unclear	unclear	low	yes	yes	yes	yes	low	low
Wang, L. and X. Pu（2014）	yes	no	yes	high	low	yes	unclear	unclear	low	yes	unclear	unclear	low	yes	yes	yes	no	high	low
Wang D（2013）	yes	yes	yes	low	low	yes	unclear	unclear	low	yes	unclear	unclear	low	yes	yes	yes	yes	low	low
Wang F，et al.（2014）	yes	yes	yes	low	low	yes	unclear	unclear	low	yes	unclear	unclear	low	yes	yes	yes	no	high	low
T. Wybraniec, et al.(2017)	yes	yes	yes	low	low	yes	unclear	unclear	low	yes	unclear	unclear	low	yes	yes	yes	no	high	low
